# Supplementary material
Source: PubMed Central journal article supplement (PMC7364149)
Supplement: mmc2.pdf [file mmc2.pdf]

# INDIVIDUAL CONFLICT OF INTEREST STATEMENT

## *American Association of Hip and Knee Surgeons*

(Adopted from the American Academy of Orthopaedic Surgeons disclosure statement)

The following form **must be filled out completely and submitted by each author (example, 6 authors, 6 forms).**  
**All items require a response. If there is no relevant disclosure for a given item, enter "None."**

Is There Benefit in Keeping Early Discharge Patients Overnight After Total Joint Arthroplasty?

---

### Manuscript Title

1. Royalties from a company or supplier (The following conflicts were disclosed)  
DJO Surgical, Osteoremedies
2. Speakers bureau/paid presentations for a company or supplier (The following conflicts were disclosed)  
None
- 3A. Paid employee for a company or supplier (The following conflicts were disclosed)  
None
- 3B. Paid consultant for a company or supplier (The following conflicts were disclosed)  
DJO, Osteoremedies, Kinamed, KCI, SCA
- 3C. Unpaid consultants for a company or supplier (The following conflicts were disclosed)  
None
4. Stock or stock options in a company or supplier (The following conflicts were disclosed)  
Emovi
5. Research support from a company or supplier as a Principal Investigator (The following conflicts were disclosed)  
DJO
6. Other financial or material support from a company or supplier (The following conflicts were disclosed)  
None
7. Royalties, financial or material support from publishers (The following conflicts were disclosed)  
None
8. Medical/Orthopaedic publications editorial/governing board (The following conflicts were disclosed)  
Journal of Arthroplasty; Orthopedics Today
9. Board member/committee appointments for a society (The following conflicts were disclosed)  
AAHKS, ICJR, Knee Society

### **Each author must sign AND print or type his/her name, date and submit a separate form**

In addition, one BLINDED Conflict of Interest form (no author names used) should be submitted per manuscript with all author disclosures.

R. Michael Meneghini

*R. Michael Meneghini*

4/20/2020

Author Name (Print or Type)

Author Signature

Date
